# Supplementary material
Source: PubMed Central journal article supplement (PMC3957640)
Supplement: AEM.03859-13_zam999105196so1.pdf [file AEM.03859-13_zam999105196so1.pdf]

**Table S2. PCR primer pairs used in this study**

| <b>Primers</b> | <b>Sequence (5'-3')</b> | <b>Genes</b> | <b>Product size (bp)</b> | <b>References</b> |
|----------------|-------------------------|--------------|--------------------------|-------------------|
| ESP14F         | AGATTTTCATCTTTGATTCTTGG | <i>esp</i>   | 510                      | (1)               |
| ESP12R         | AATTGATTCTTTAGCATCTGG   |              |                          |                   |
| GEL11          | TATGACAATGCTTTTTGGGAT   | <i>gelE</i>  | 213                      | (2)               |
| GEL12          | AGATGCACCCGAAATAATATA   |              |                          |                   |
| HYLn1          | ACAGAAGAGCTGCAGGAAATG   | <i>hyl</i>   | 276                      | (2)               |
| HYLn2          | GACTGACGTCCAAGTTTCCAA   |              |                          |                   |

**Table S3. Comparison of *E. faecium* complete genomes**

| Strains          | Chromosome / Plasmids | GC (%)       | Length (bp)      | CDS          | rRNA      | tRNA      | GenBank  | References        |
|------------------|-----------------------|--------------|------------------|--------------|-----------|-----------|----------|-------------------|
| <b>NRRL</b>      | <b>Total</b>          | <b>37.87</b> | <b>2,849,891</b> | <b>2,639</b> | <b>18</b> | <b>49</b> | -        | <b>This study</b> |
| <b>B-2354</b>    | Chromosome            | 38.03        | 2,635,572        | 2,435        | 18        | 49        | CP004063 |                   |
|                  | Plasmid pNB2354_1     | 35.98        | 214,319          | 204          | 0         | 0         | CP004064 |                   |
| <b>Aus0004</b>   | <b>Total</b>          | <b>38.31</b> | <b>3,019,780</b> | <b>2,932</b> | <b>18</b> | <b>47</b> | -        | <b>(3)</b>        |
|                  | Chromosome            | 38.36        | 2,955,294        | 2,860        | 18        | 47        | CP003351 |                   |
|                  | Plasmid AUS0004_p1    | 35.39        | 56,520           | 63           | 0         | 0         | CP003352 |                   |
|                  | Plasmid AUS0004_p2    | 38.99        | 3,847            | 4            | 0         | 0         | CP003353 |                   |
|                  | Plasmid AUS0004_p3    | 36.81        | 4,119            | 5            | 0         | 0         | CP003354 |                   |
| <b>TX16 (DO)</b> | <b>Total</b>          | <b>37.87</b> | <b>3,052,572</b> | <b>3,114</b> | <b>18</b> | <b>64</b> | -        | <b>(4)</b>        |
|                  | Chromosome            | 38.15        | 2,698,137        | 2,703        | 18        | 62        | CP003583 |                   |
|                  | Plasmid 1             | 36.51        | 36,262           | 43           | 0         | 0         | CP003584 |                   |
|                  | Plasmid 2             | 34.38        | 66,247           | 85           | 0         | 2         | CP003585 |                   |
|                  | Plasmid 3             | 35.97        | 251,926          | 283          | 0         |           | CP003586 |                   |

**Table S4. Enrichment of non-clinical (NC) and clinical (CL) isolates in MLST groups<sup>a</sup>**

| MLST | No. of NC isolates | No. of CL isolates | Total No. | Origins enriched | <i>P</i> values |
|------|--------------------|--------------------|-----------|------------------|-----------------|
| 17   | 47                 | 142                | 189       | CL Isolates      | 2.51E-14        |
| 18   | 37                 | 103                | 140       | CL Isolates      | 4.28E-10        |
| 310  | 28                 | 0                  | 28        | NC Isolates      | 3.86E-08        |
| 16   | 17                 | 54                 | 71        | CL Isolates      | 7.67E-07        |
| 306  | 1                  | 22                 | 23        | CL Isolates      | 1.10E-06        |
| 114  | 0                  | 16                 | 16        | CL Isolates      | 5.19E-06        |
| 6    | 19                 | 0                  | 19        | NC Isolates      | 7.82E-06        |
| 454  | 18                 | 0                  | 18        | NC Isolates      | 1.46E-05        |
| 266  | 25                 | 3                  | 28        | NC Isolates      | 8.19E-05        |
| 398  | 14                 | 0                  | 14        | NC Isolates      | 1.83E-04        |
| 20   | 0                  | 10                 | 10        | CL Isolates      | 4.89E-04        |
| 4    | 11                 | 0                  | 11        | NC Isolates      | 1.26E-03        |
| 132  | 0                  | 8                  | 8         | CL Isolates      | 2.24E-03        |
| 412  | 0                  | 7                  | 7         | CL Isolates      | 4.79E-03        |
| 19   | 24                 | 6                  | 30        | NC Isolates      | 4.79E-03        |
| 10   | 8                  | 0                  | 8         | NC Isolates      | 8.89E-03        |
| 5    | 14                 | 2                  | 16        | NC Isolates      | 9.41E-03        |
| 192  | 26                 | 43                 | 69        | CL Isolates      | 1.01E-02        |
| 204  | 0                  | 6                  | 6         | CL Isolates      | 1.02E-02        |
| 81   | 0                  | 6                  | 6         | CL Isolates      | 1.02E-02        |
| 78   | 82                 | 106                | 188       | CL Isolates      | 1.15E-02        |
| 300  | 7                  | 0                  | 7         | NC Isolates      | 1.72E-02        |
| 202  | 8                  | 19                 | 27        | CL Isolates      | 1.84E-02        |
| 32   | 9                  | 1                  | 10        | NC Isolates      | 2.45E-02        |
| 361  | 6                  | 0                  | 6         | NC Isolates      | 3.35E-02        |
| 393  | 6                  | 0                  | 6         | NC Isolates      | 3.35E-02        |
| 8    | 6                  | 0                  | 6         | NC Isolates      | 3.35E-02        |
| 21   | 8                  | 1                  | 9         | NC Isolates      | 4.31E-02        |
| 203  | 16                 | 27                 | 43        | CL Isolates      | 4.37E-02        |
| 80   | 3                  | 10                 | 13        | CL Isolates      | 4.68E-02        |
| 341  | 0                  | 4                  | 4         | CL Isolates      | 4.71E-02        |

<sup>a</sup> This table was summarized from the *E. faecium* MLST database (<http://efaecium.mlst.net/>) on May 30, 2012 and sorted by *P* values calculated by Fisher's Exact Test.

**Table S5. Genes unique to NRRL B-2354**

| Clusters | Length (bp) | Products <sup>a</sup>                                        | G+C (%) | Protein IDs <sup>b</sup> |
|----------|-------------|--------------------------------------------------------------|---------|--------------------------|
| SP1      | 3111        | Type III restriction enzyme, DEAD/DEAH box helicase          | 38.96   | AGE29399                 |
| SP1      | 129         | Site-specific recombinase, phage integrase family            | 30.23   | AGE29384                 |
| SP1      | 258         | Hypothetical protein                                         | 33.72   | AGE29392                 |
| SP1      | 1221        | Hypothetical protein                                         | 31.70   | AGE29386                 |
| SP1      | 597         | Hypothetical protein                                         | 35.34   | AGE29395                 |
| SP1      | 624         | Hypothetical protein                                         | 33.33   | AGE29389                 |
| SP1      | 1704        | Phage integrase (Site-specific recombinase)                  | 42.37   | AGE29393                 |
| SP1      | 1335        | Reverse transcriptase with group II intron origin            | 29.66   | AGE29382                 |
| SP1      | 1839        | Type III restriction-modification system methylation subunit | 36.11   | AGE29396                 |
| SP1      | 189         | DNA repair protein RadC                                      | 37.57   | AGE29387                 |
| SP1      | 366         | Hypothetical protein                                         | 33.33   | AGE29381                 |
| SP1      | 321         | Hypothetical protein                                         | 36.14   | AGE29388                 |
| SP1      | 1362        | Hypothetical protein                                         | 41.63   | AGE29400                 |
| SP1      | 198         | Hypothetical protein                                         | 31.31   | AGE29385                 |
| SP1      | 237         | Putative DNA primase                                         | 33.76   | AGE29391                 |
| SP1      | 831         | Site-specific recombinase, phage integrase family            | 37.42   | AGE29384                 |
| SP1      | 921         | Hypothetical protein                                         | 33.55   | AGE29390                 |
| SP1      | 924         | Hypothetical protein                                         | 30.09   | AGE29397                 |
| SP1      | 576         | Hypothetical protein                                         | 31.60   | AGE29398                 |
| SP1      | 1020        | Restriction-modification system, specificity subunit         | 30.20   | AGE29401                 |
| SP1      | 3189        | DEAD/DEAH box helicase-like protein                          | 37.06   | AGE29394                 |
| SP1      | 438         | DNA repair protein RadC                                      | 36.99   | AGE29387                 |
| SP1      | 441         | Hypothetical protein                                         | 36.51   | AGE29383                 |
| SP2      | 162         | Polysaccharide biosynthesis protein                          | 25.47   | AGE29666                 |
| SP2      | 411         | Putative glycosyltransferase                                 | 30.90   | AGE29664                 |
| SP2      | 132         | Putative glycosyltransferase                                 | 31.06   | AGE29668                 |
| SP2      | 147         | Polysaccharide biosynthesis protein                          | 24.66   | AGE29666                 |
| SP3      | 120         | Hypothetical protein                                         | 38.33   | AGE29958                 |
| SP3      | 309         | Hypothetical protein                                         | 39.81   | AGE29964                 |
| SP3/SP5  | 402         | Hypothetical protein                                         | 34.83   | AGE29981                 |
| SP3/SP5  | 963         | Bacteriophage mv4 main capsid protein Gp34                   | 36.03   | AGE29978                 |
| SP3/SP5  | 180         | Hypothetical protein                                         | 33.89   | AGE29979                 |
| SP3/SP5  | 351         | Phage minor capsid protein                                   | 38.75   | AGE29983                 |
| SP3/SP5  | 2253        | Phage tail protein                                           | 39.59   | AGE29992                 |
| SP3/SP5  | 390         | Minor capsid protein                                         | 31.28   | AGE29983                 |

|         |      |                                                   |       |          |
|---------|------|---------------------------------------------------|-------|----------|
| SP3/SP5 | 348  | Phage minor capsid protein                        | 32.76 | AGE29982 |
| SP3/SP5 | 360  | Hypothetical protein                              | 36.67 | AGE29979 |
| SP3/SP5 | 540  | Minor capsid protein                              | 38.70 | AGE29985 |
| SP3/SP5 | 408  | Hypothetical protein                              | 25.74 | AGE30663 |
| SP4     | 693  | Transcriptional antiterminator of lichenan operon | 28.14 | AGE30148 |
| SP4     | 1110 | Transcriptional antiterminator of lichenan operon | 29.37 | AGE30148 |
| SP4     | 1683 | Amidohydrolase domain protein                     | 31.97 | AGE30150 |
| SP4     | 1608 | Major facilitator superfamily                     | 35.45 | AGE30149 |
| SP5     | 489  | Hypothetical protein                              | 31.49 | AGE30682 |
| SP5     | 291  | Hypothetical protein                              | 29.55 | AGE30683 |

<sup>a</sup> Annotation was performed manually and included comparisons to 31 *E. faecium* genomes (5).

<sup>b</sup> Protein IDs accession numbers in GenBank (<http://www.ncbi.nlm.nih.gov/genbank/>).

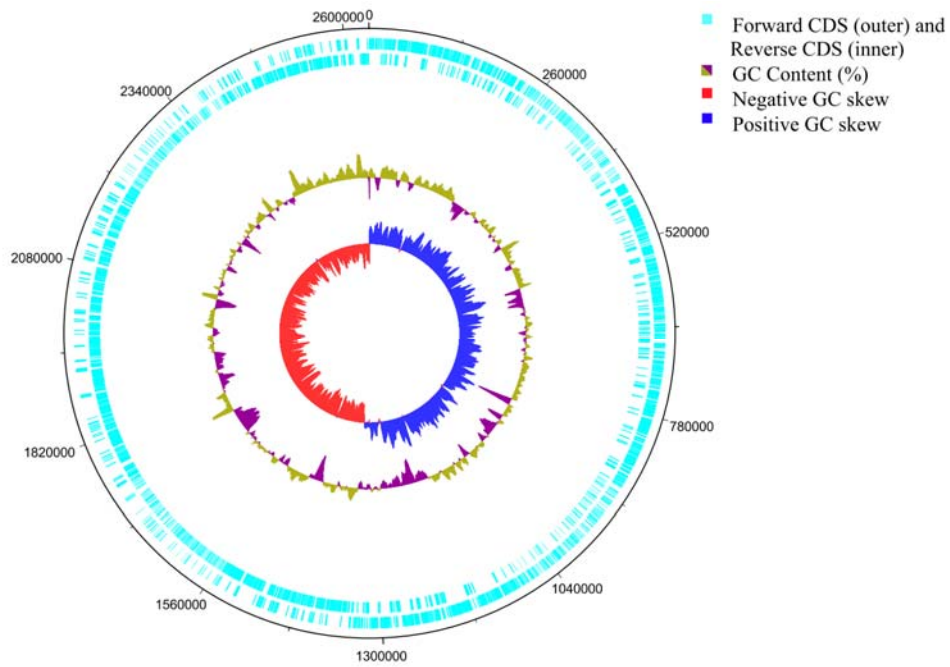

**Figure S1. Circular map of the *E. faecium* NRRL B-2354 chromosome.** The circular genome map was generated by using DNAPlotter (6). Tracks from inside to outside are as follows: GC skew  $(G - C)/(G + C)$ , GC content, reverse genes, and forward genes.

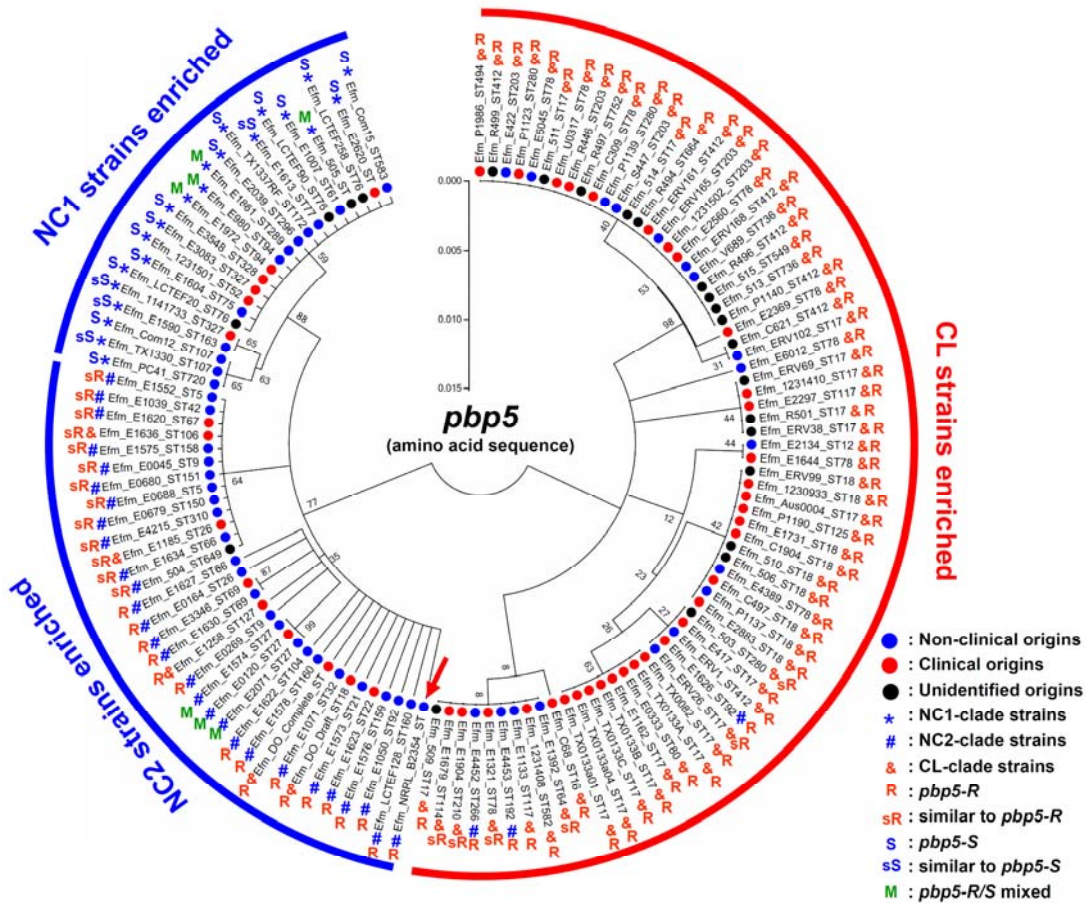

**Figure S2. Phylogenetic tree of ampicillin-binding PBP5 amino acid sequences of 125 *E. faecium* genomes.** Protein sequences of *pbp5* from 125 *E. faecium* genomes were analyzed to identify phylogenetic relationships. The PBP5 sequences from all strains shown in Figure 1 are included except for strains D344SRF and TC6 because the PBP5 gene was not identified in those genomes. *Pbp5* analysis was based on a previous study (7). The red arrow indicates the position of strain NRRL B-2354 in the dendrogram. The phylogenetic relationships were confirmed by 1,000 replicates of bootstrapping based on the neighbor joining method.

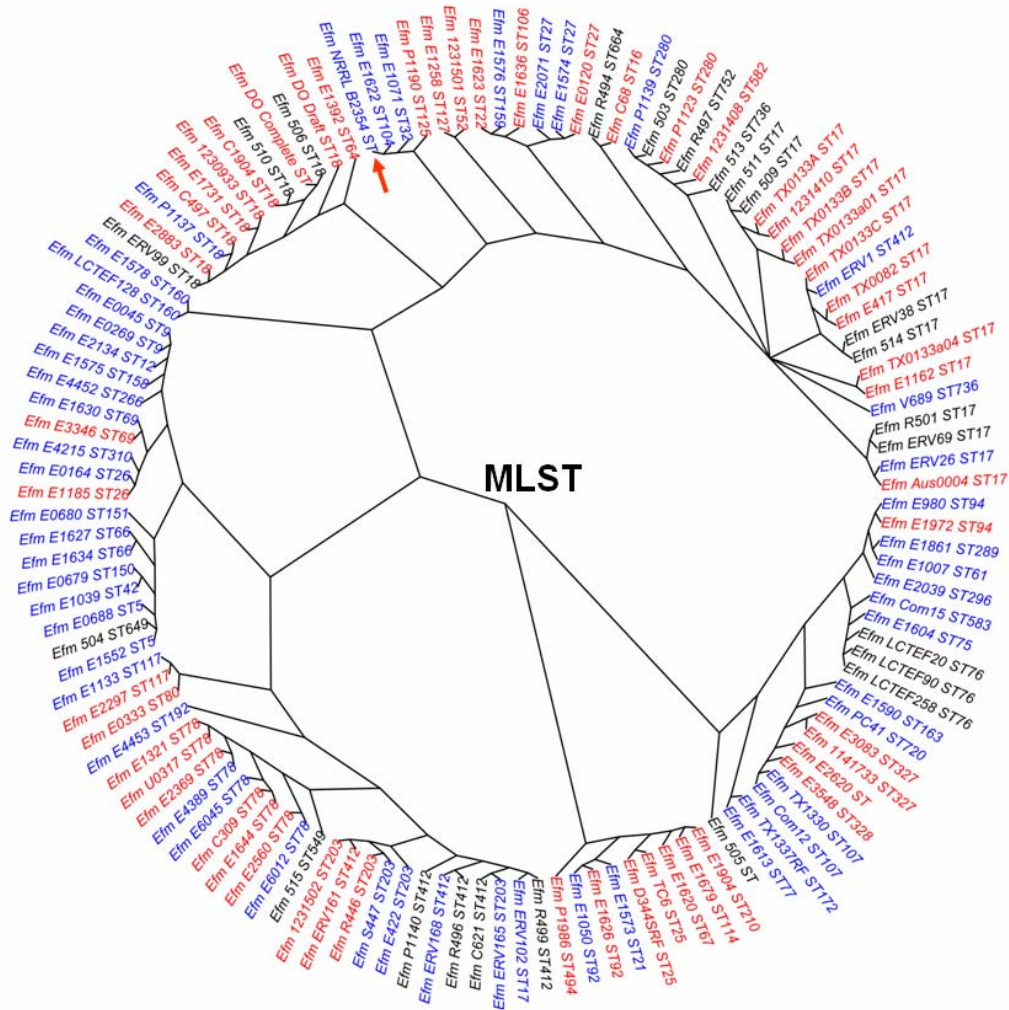

**Figure S3. Phylogenetic tree of MLST sequences using 127 *E. faecium* strains.**

Concatenated sequences of seven housekeeping genes (*adk*, *atpA*, *ddl*, *gdh*, *gyd*, *pstS*, and *purK*) from clinical (red), non-clinical (blue), and origin-unknown (black) strains were analyzed. NRRL B-2354 is indicated with a red arrow. The phylogenetic relationships were confirmed by 2,000 replicates of bootstrapping based on the neighbor joining method using MEGA5 (8).



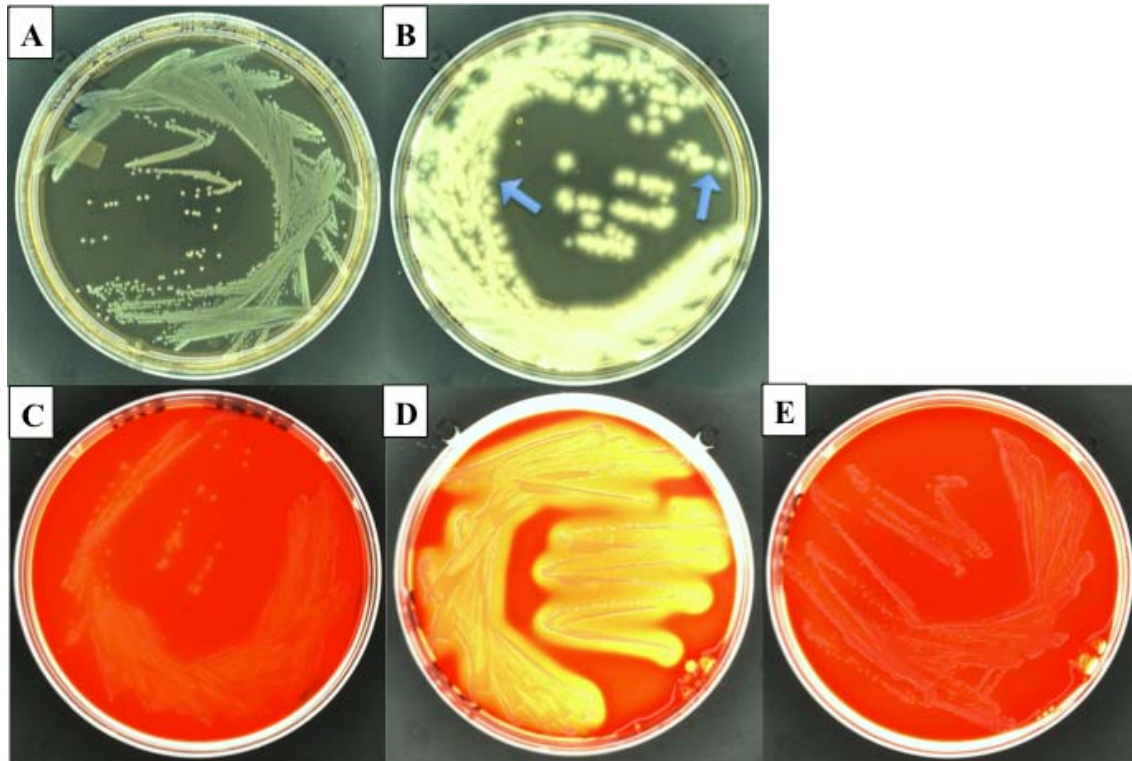

**Figure S4. Gelatinase activity and hemolysin activity of NRRL B-2354.** Growth of (A) *E. faecium* NRRL B-2354 and (B) positive control strain, *Bacillus cereus* ATCC 14579, on Todd Hewitt agar containing 3% gelatin. Arrows in (B) point to zones of turbidity, indicative of gelatin hydrolysis. Growth of (C) *E. faecium* NRRL B-2354, (D) the positive control strain, *E. faecalis* ATCC 29212, and (E) the negative control strain *E. coli* DH5 $\alpha$  on tryptic soy agar supplemented with 5% defibrinated horse blood. Zones of clearing in (D) indicate lysis of red blood cells.



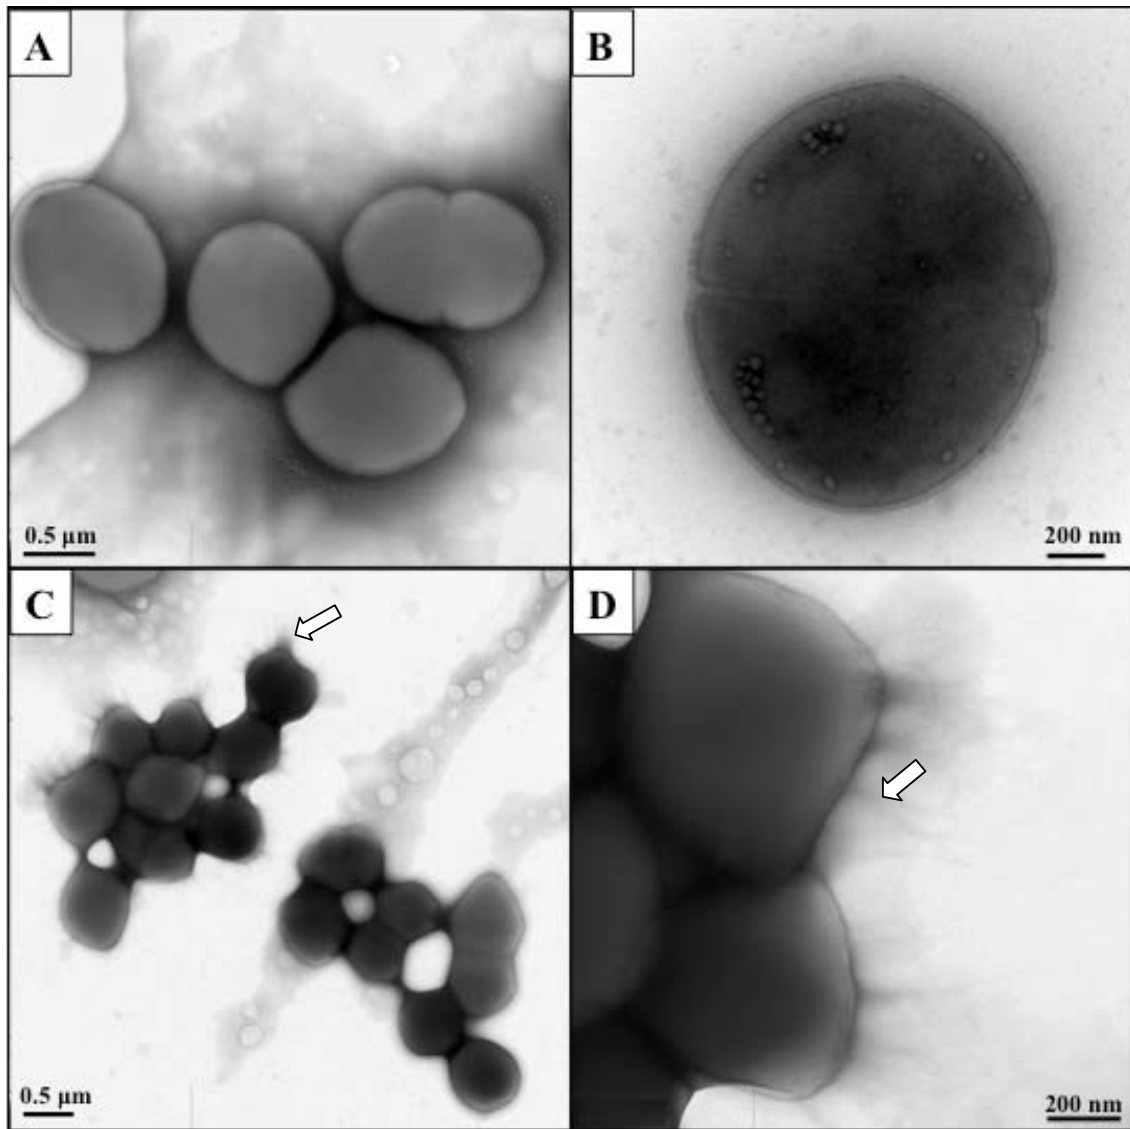

**Figure S6. *E. faecium* pilus detection.** (A-D) Transmission electron microscopy of *E. faecium* NRRL B-2354 and TX0082. (A-B) Pili were not found on *E. faecium* NRRL B-2354. (C-D) *E. faecium* TX0082 contained pili as indicated by the arrows.

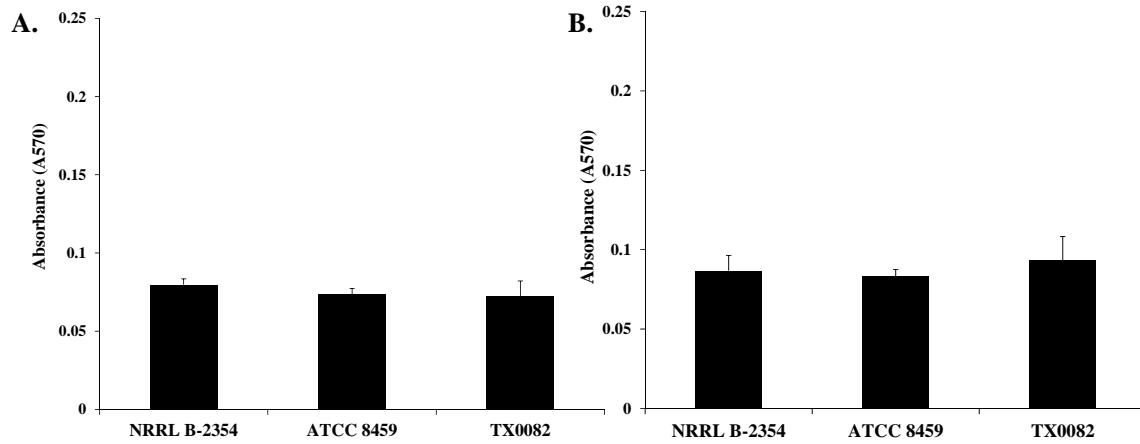

**Figure S7. *E. faecium* binding to fibrinogen and fibronectin.** (A) Binding to fibrinogen. No statistically significant difference was observed (Tukey's HSD,  $P < 0.05$ ). The average  $\pm$  stdev of four replicates per strain is shown. (B) Binding to fibronectin. No statistically significant difference was observed (Tukey's HSD,  $P < 0.05$ ). The average  $\pm$  stdev of four replicates per strain is shown.

## References for Supplemental Materials

1. **Willems RJ, Homan W, Top J, van Santen-Verheувel M, Tribe D, Manzioros X, Gaillard C, Vandenbroucke-Grauls CM, Mascini EM, van Kregten E, van Embden JD, Bonten MJ.** 2001. Variant *esp* gene as a marker of a distinct genetic lineage of vancomycin-resistant *Enterococcus faecium* spreading in hospitals. *Lancet* **357**:853-855.
2. **Vankerckhoven V, Van Autgaerden T, Vael C, Lammens C, Chapelle S, Rossi R, Jabes D, Goossens H.** 2004. Development of a multiplex PCR for the detection of *asa1*, *gelE*, *cylA*, *esp*, and *hyl* genes in enterococci and survey for virulence determinants among European hospital isolates of *Enterococcus faecium*. *J. Clin. Microbiol.* **42**:4473-4479.
3. **Lam MM, Seemann T, Bulach DM, Gladman SL, Chen H, Haring V, Moore RJ, Ballard S, Grayson ML, Johnson PD, Howden BP, Stinear TP.** 2012. Comparative analysis of the first complete *Enterococcus faecium* genome. *J. Bacteriol.* **194**:2334-2341.
4. **Qin X, Galloway-Pena JR, Sillanpaa J, Hyeob Roh J, Nallapareddy SR, Chowdhury S, Bourgogne A, Choudhury T, Munzy DM, Buhay CJ, Ding Y, Dugan-Rocha S, Liu W, Kovar C, Sodergren E, Highlander S, Petrosino JF, Worley KC, Gibbs RA, Weinstock GM, Murray BE.** 2012. Complete genome sequence of *Enterococcus faecium* strain TX16 and comparative genomic analysis of *Enterococcus faecium* genomes. *BMC Microbiol.* **12**:135.
5. **Kim EB, Marco ML.** 2014. Non-clinical and clinical strains of *Enterococcus faecium* but not *Enterococcus faecalis* strains have distinct structural and functional genomic features. *Appl. Environ. Microbiol.* **80**(1):154-65.
6. **Carver T, Thomson N, Bleasby A, Berriman M, Parkhill J.** 2009. DNAPlotter: circular and linear interactive genome visualization. *Bioinformatics* **25**:119-120
7. **Galloway-Peña JR, Rice LB, Murray BE.** 2011. Analysis of PBP5 of early U.S. isolates of *Enterococcus faecium*: sequence variation alone does not explain increasing ampicillin resistance over time. *Antimicrob. Agents Chemother.* **55**:3272-3277.
8. **Tamura K, Peterson D, Peterson N, Stecher G, Nei M, Kumar S.** 2011. MEGA5: Molecular evolutionary genetics analysis using maximum likelihood, evolutionary distance, and maximum parsimony methods. *Mol. Biol. Evol.* **28**:2731-2739.
